# Supplementary material for: Vinegar Production from Corinthian Currants Finishing Side-Stream: Development and Comparison of Methods Based on Immobilized Acetic Acid Bacteria
Source: MDPI journal article supplement (doi:10.3390/foods10123133), 2021-12-17
Supplement: s1 [file s1]

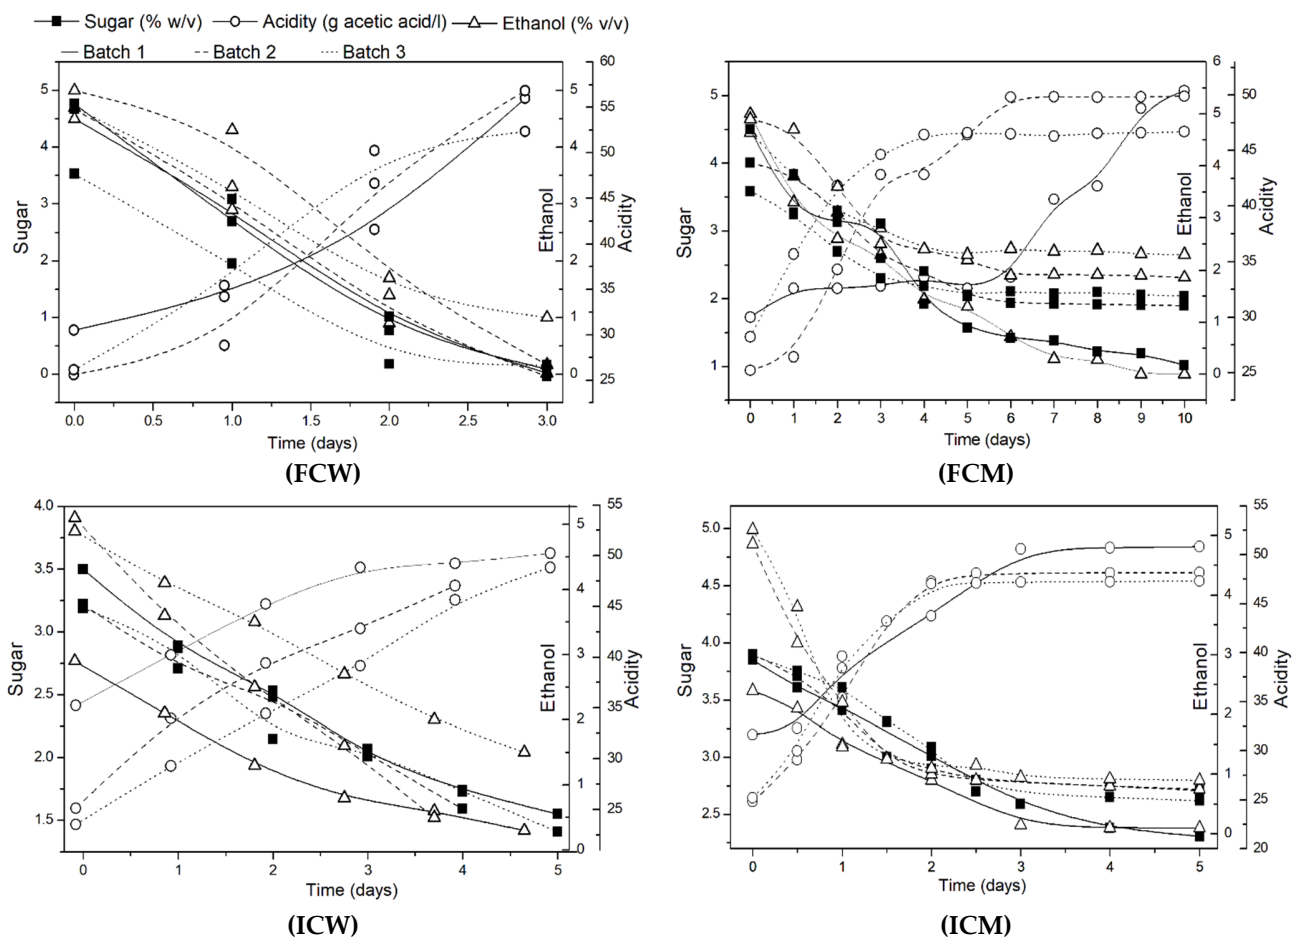

**Figure S1.** Kinetics of the acetification of wine at 30°C using wild AAB culture, free (FCW) and immobilized (ICW), and the mixed AAB culture (*A. aceti* & *K. europaeus*), free (FCM) and immobilized (ICM).

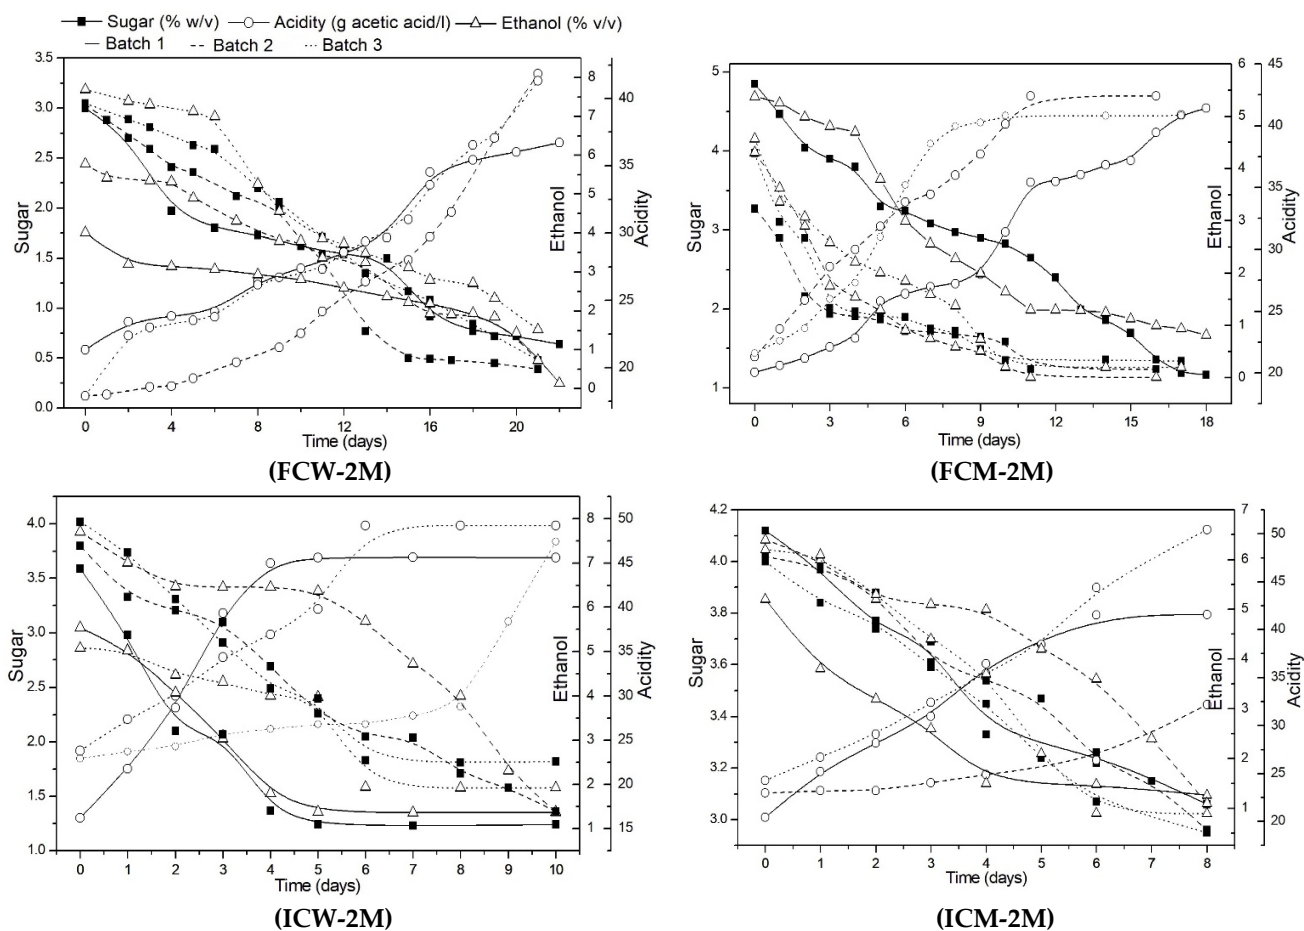

**Figure S2.** Kinetics of the acetification of wine at 30°C, reusing the wild AAB culture, free (FCW-2M) and immobilized (ICW-2M), and the mixed AAB culture (*A. aceti* & *K. europaeus*), free (FCM-2M) and immobilized (ICM-2M), after 2-months of cold storage at 4°C.

**Table S1.** Parameters of the sigmoidal (Boltzmann) model curve fit of the experimental data means of 3 acetification batches (Figures 3 and 4).

| Parameter             | Biocatalyst  |               |               |               |               |               |               |               |
|-----------------------|--------------|---------------|---------------|---------------|---------------|---------------|---------------|---------------|
|                       | FCW          | FCM           | ICW           | ICM           | FCW-2M        | FCM-2M        | ICW-2M        | ICM-2M        |
| <i>Sugar</i>          |              |               |               |               |               |               |               |               |
| <i>A</i> <sub>1</sub> | 2.9133       | 4.649         | 6.267         | 4.097         | 4.874         | 122.791       | 5.143         | 4.204         |
| <i>A</i> <sub>2</sub> | 0.246        | 1.677         | 0.684         | 2.588         | -0.541        | 0.911         | 1.432         | 2.866         |
| <i>t</i> <sub>o</sub> | 1.071        | 1.732         | -0.397        | 1.123         | 6.543         | -29.864       | 1.206         | 3.425         |
| <i>dt</i>             | 0.522        | 1.442         | 2.969         | 0.627         | 9.938         | 8.056         | 2.137         | 1.925         |
| <i>R</i> <sup>2</sup> | <b>1.000</b> | <b>0.9939</b> | <b>0.9988</b> | <b>0.9901</b> | <b>0.9990</b> | <b>0.9843</b> | <b>0.998</b>  | <b>0.9977</b> |
| <i>Ethanol</i>        |              |               |               |               |               |               |               |               |
| <i>A</i> <sub>1</sub> | 5.0262       | 10.706        | 6.203         | 33.218        | 9.014         | 6.699         | 10.921        | 8.499         |
| <i>A</i> <sub>2</sub> | 0.200        | 1.376         | 0.516         | 0.711         | -15.217       | 0.290         | -0.800        | -0.398        |
| <i>t</i> <sub>o</sub> | 1.394        | -1.091        | 0.965         | -1.648        | 39.385        | 2.507         | 2.101         | 2.865         |
| <i>dt</i>             | 0.511        | 2.092         | 1.447         | 0.786         | 23.268        | 3.161         | 5.718         | 3.187         |
| <i>R</i> <sup>2</sup> | <b>1.000</b> | <b>0.9997</b> | <b>0.9964</b> | <b>0.9127</b> | <b>0.9554</b> | <b>0.9964</b> | <b>0.9985</b> | <b>0.9997</b> |
| <i>Acidity</i>        |              |               |               |               |               |               |               |               |
| <i>A</i> <sub>1</sub> | 26.163       | -156.22       | -9.246        | 22.421        | 18.746        | 16.379        | -65.615       | 16.352        |
| <i>A</i> <sub>2</sub> | 57.618       | 52.453        | 54.448        | 48.618        | 56.593        | 41.948        | 58.559        | 51.667        |
| <i>t</i> <sub>o</sub> | 1.703        | -9.754        | -0.804        | 0.865         | 19.416        | 4.938         | -5.564        | 4.453         |
| <i>dt</i>             | 0.534        | 4.845         | 2.336         | 0.492         | 6.102         | 3.254         | 6.752         | 2.960         |
| <i>R</i> <sup>2</sup> | <b>1.000</b> | <b>0.9962</b> | <b>0.9996</b> | <b>0.9978</b> | <b>0.9909</b> | <b>0.9995</b> | <b>0.9968</b> | <b>0.9944</b> |

Curve fit was done by Microcal Origin 6.0 software, based on the Boltzmann equation:

$$C(t) = \frac{A_1 - A_2}{1 + e^{\frac{t-t_o}{dt}}} + A_2$$

where C(t) is the concentration of sugar, ethanol, or acidity in time t, *A*<sub>1</sub> and *A*<sub>2</sub> are the initial and final positions of two asymptotes to the C(t) curve, *t*<sub>o</sub> is the t-coordinate of the highest value of the curve slope, and *dt* is the width of the step of exponential decrease.

**Table S2.** Acetification rates as slopes of the linear fits of the growth phases of the Boltzmann sigmoidal curves of Figures 3 and 4.

| Linear fit*           | Biocatalyst |           |           |            |           |           |           |           |
|-----------------------|-------------|-----------|-----------|------------|-----------|-----------|-----------|-----------|
|                       | FCW         | FCM       | ICW       | ICM        | FCW-2M    | FCM-2M    | ICW-2M    | ICM-2M    |
| <i>Slope (b)</i>      | 9.48±0.80   | 3.04±0.32 | 4.48±0.27 | 10.05±0.99 | 1.01±0.05 | 1.67±0.04 | 2.53±0.08 | 2.62±0.13 |
| <i>R</i> <sup>2</sup> | 1.00±0.22   | 0.97±0.33 | 1.00±0.22 | 0.99±0.64  | 0.98±0.82 | 1.00±0.17 | 1.00±0.28 | 0.99±0.18 |

A=a+b×t; A=acidity (g/l), t=time (d)
